# Supplementary material for: Inhibition of 11β-hydroxysteroid dehydrogenase 1 relieves fibrosis through depolarizing of hepatic stellate cell in NASH
Source: Springer Nature journal article supplement (doi:10.1038/s41419-022-05452-x), 2022-11-29

Fig 1A.

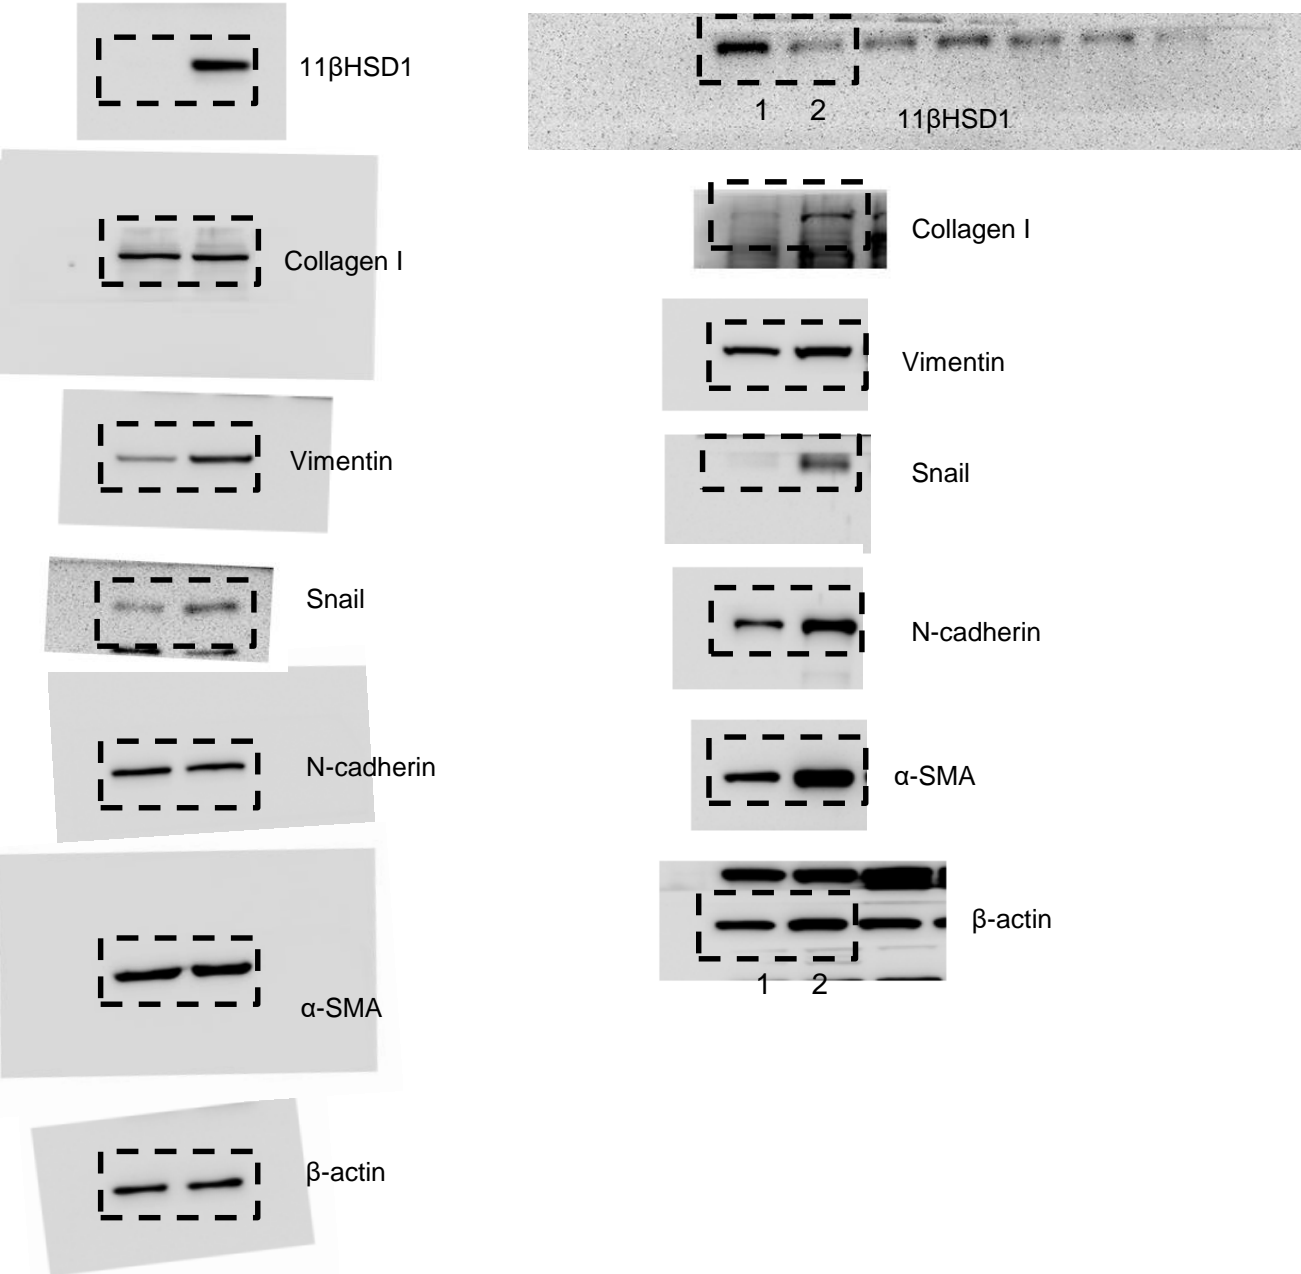

**Fig 1B.**

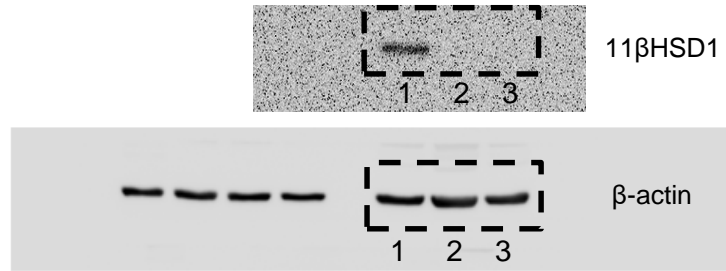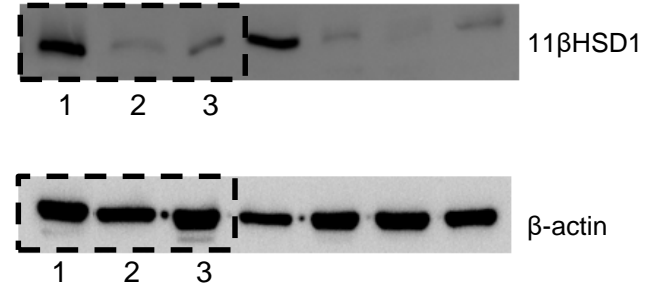

**Fig 1C.**

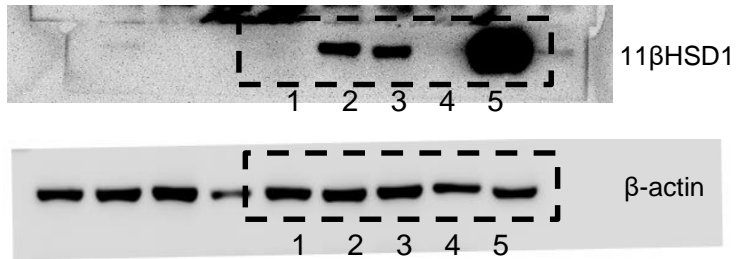

**Fig 1D.**

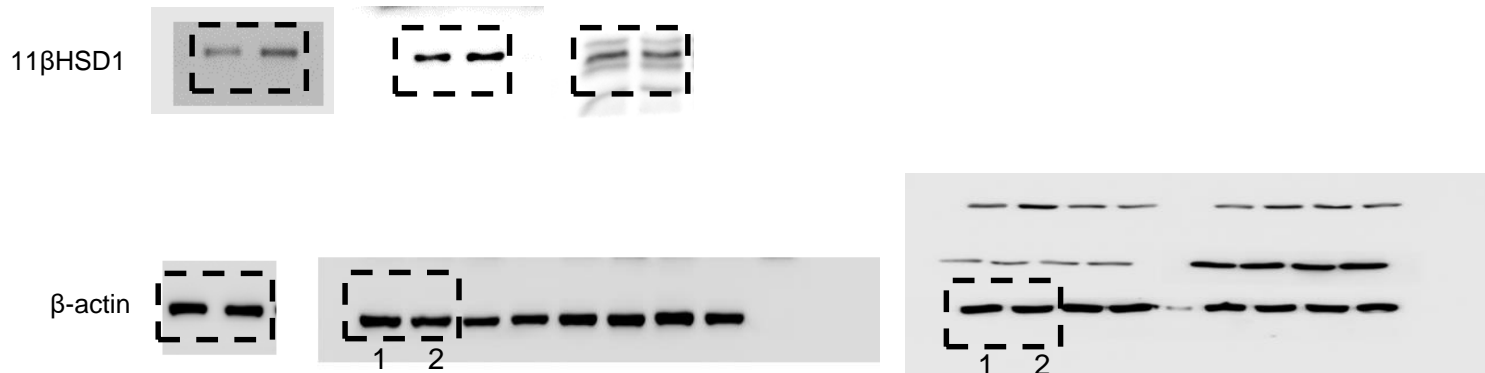

**Fig 1I.**

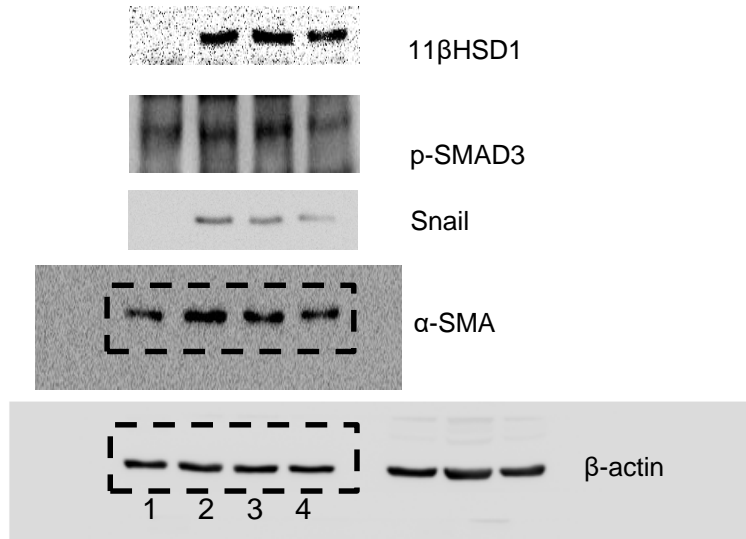

**Fig 2B.**

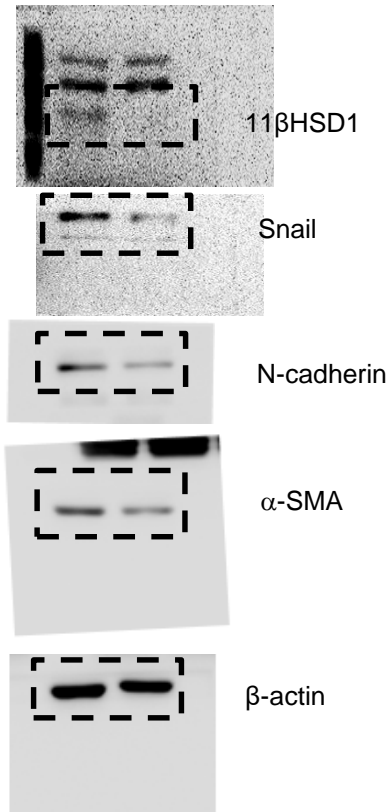

**Fig 2E.**

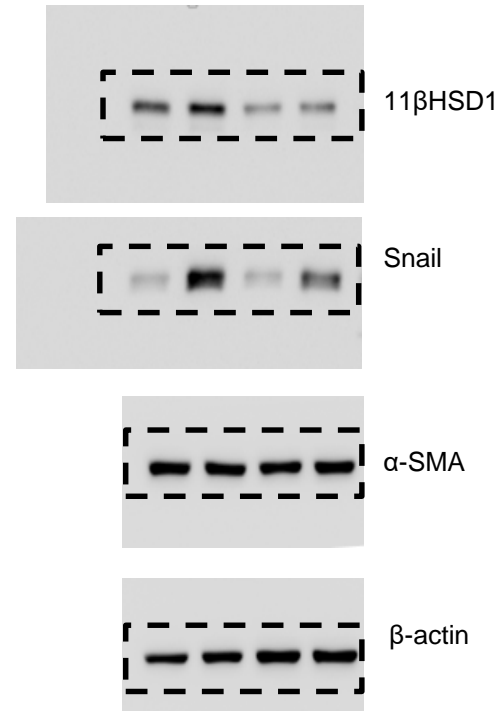

**Fig 2G.**

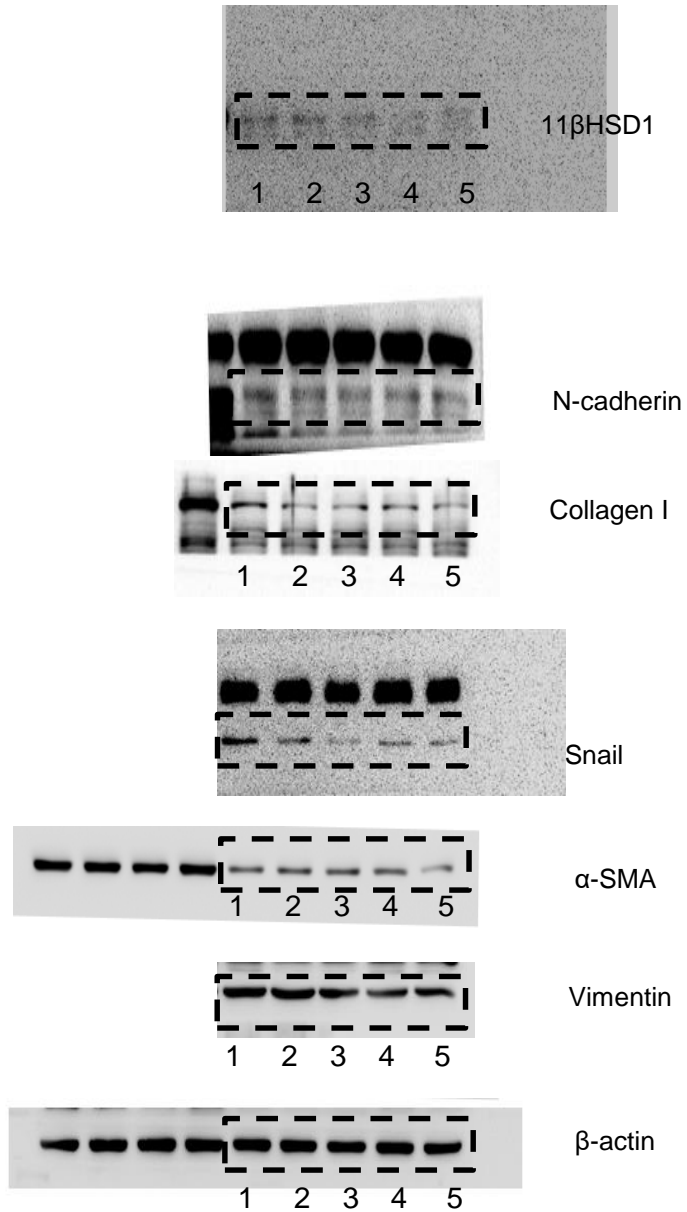

**Fig 2I.**

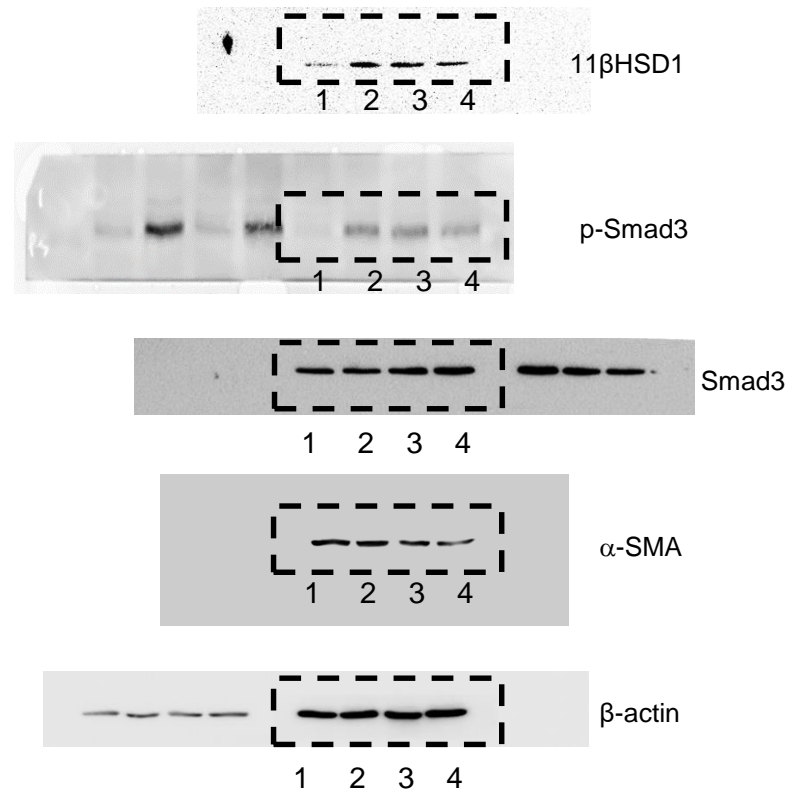

Supplement: MOESM2 [file 41419_2022_5452_MOESM2_ESM.pdf]
